# Supplementary material
Source: PubMed Central journal article supplement (PMC3359061)
Supplement: NIHMS378317-supplement-SI.pdf [file NIHMS378317-supplement-SI.pdf]

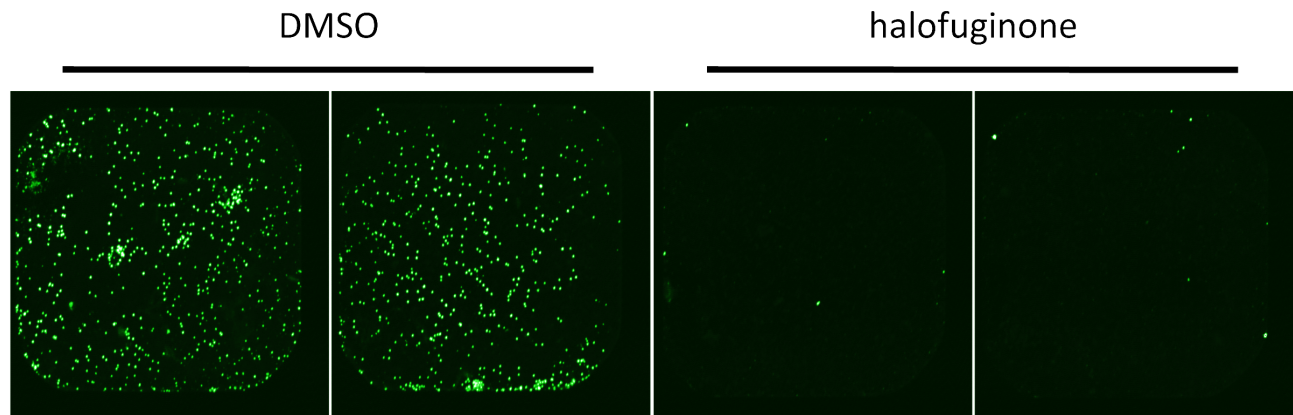

Figure S1. High-resolution image of Figure 1a. Visualization of *P. berghei* sporozoite load in HepG2 cells by staining with an antimalarial antibody: cells were infected in the presence of DMSO or 1  $\mu\text{m}$  halofuginone and fixed 36 – 48 h after sporozoite addition.

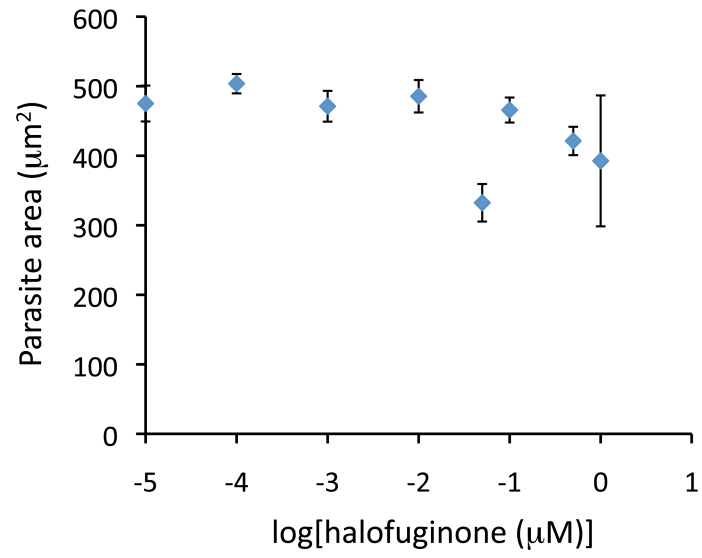

Figure S2. Parasite size is not affected by halofuginone. Parasite size (average parasite area) was measured by quantitative high content image analysis using Velos software and plotted as a function of halofuginone concentration. Data are shown as the average reading of 3 measurements on the same 384-well plate and error bars show the standard deviation.

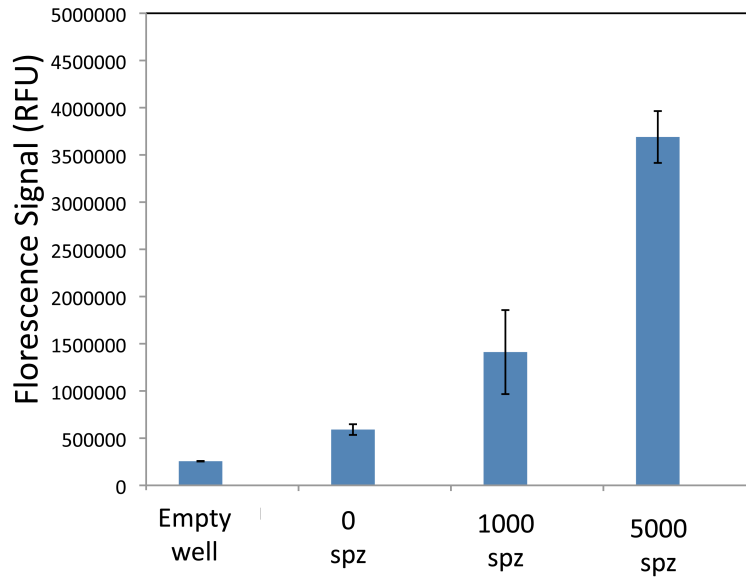

Figure S3. Dependence of traversal on sporozoite numbers. The relative fluorescence signal of empty wells or HepG2 cells (12,000 cells/well) incubated with 0, 1,000 or 5,000 sporozoites/well is shown. The fluorescence signal is dependent on the number of sporozoites added suggesting that the relative numbers of traversed HepG2 cells can be measured using a fluorescence plate reader. Data are shown as the average fluorescence reading of 4 measurements on the same 384-well plate and error bars show the standard deviation
